## **Wastewater Surveillance for SARS-CoV-2 in an Atlanta, Georgia Jail: A study of the feasibility of wastewater monitoring and correlation of building wastewater and individual testing results.**

Lindsay B. Saber MPH<sup>1</sup>, Shanika Kennedy MPH<sup>1</sup>, Yixin Yang<sup>1</sup>, Kyler Moore MPH<sup>1</sup>, Yuke Wang MSPH<sup>1</sup>, Stephen P. Hilton MS MSE<sup>1</sup>, Tylis Chang MD<sup>2</sup>, Pengbo Liu PhD<sup>1</sup>, Victoria L. Phillips, PhD<sup>1</sup>, Matthew J. Akiyama MD, MSc<sup>3</sup>, Christine L. Moe PhD<sup>1</sup>, Anne C. Spaulding MD, MPH<sup>1,4\*</sup>

<sup>1</sup>Rollins School of Public Health, Emory University; <sup>2</sup>Northwell Laboratories, <sup>3</sup>Department of Medicine, Albert Einstein College of Medicine, <sup>4</sup>Emory School of Medicine

Target Journal: Clinical Infectious Diseases

Email: [lindsaysaber1@gmail.com](mailto:lindsaysaber1@gmail.com) Phone: +1-224-545-1898

\*Corresponding author: Anne Spaulding MD MPH 1518 Clifton Road Atlanta GA 30322. [Aspauld@emory.edu](mailto:Aspauld@emory.edu). 404 313 5298

### **Word Count:**

**Abstract—242**

**Main Paper—2843**

### **Funding:**

*This work was supported, in whole or in part, by the Bill & Melinda Gates Foundation [INV-035562]. Under the grant conditions of the Foundation, a Creative Commons Attribution 4.0 Generic License has already been assigned to the Author Accepted Manuscript version that might arise from this submission.*

**Subcontract with Ceres Nanosciences for “RADx Tech - Ceres Wastewater Testing” NIH prime award 75N92021C00012**

### **Key Points:**

- Monitoring the wastewater of a large jail can be effective for infectious disease surveillance.
- To diagnose COVID-19, jail residents used self-collected nasal specimens.
- There was a strong correlation between the prevalence of COVID-19 cases and the SARS-CoV-2 PCR signal in wastewater samples from the jail.

## **Abstract**

### **Background-**

Wastewater-based surveillance (WBS) on an institutional level was implemented during the COVID-19 pandemic, including carceral facilities. In this study of a mega-jail, we examined the relationship between COVID-19 diagnostic test results from jail residents and the PCR signal for SARS-CoV-2 detection in weekly samples of jail wastewater over a 28-week period.

### **Methods-**

This study in a Georgia Jail (average population ~2,700) was conducted October 2021-May 2022. Weekly on-site wastewater samples were collected (Moore Swabs) and tested for SARS-CoV-2 RNA using RTqPCR. The source of wastewater was identified using a tracer dye. The jail offered residents rapid antigen testing at entry. We conducted periodic mass screenings via RT-PCR of nasal swabs. We aggregated individual test data, calculated the Spearman correlation coefficient, and performed logistic regression to examine the relationship between the strength of the SARS-CoV-2 PCR signal (Ct value) in wastewater and the proportion of the jail population that tested positive for COVID-19.

### **Results-**

Overall, 3770 individual nasal specimens were collected; 3.4% were COVID-positive. Weekly diagnostic test positivity ranged from 0%-29.5%. Dye tests demonstrated that a single wastewater collection point was sufficiently representative of the jail's aggregate viral load. Twenty-five wastewater samples were collected. RT-qPCR Ct values for wastewater samples with SARS-CoV-2 RNA ranged from 28.1-39.9. A strong inverse correlation was observed between diagnostic test positivity and Ct value ( $r = -0.67$ ,  $p < 0.01$ ).

### **Conclusion-**

WBS was shown to be an effective strategy for surveilling COVID-19 in a large jail. Strong partnerships with the jail administration are essential to the success of WBS surveillance.

1 **Introduction**

2 Factors facilitating SARS-CoV-2 transmission include crowding, mask shortages, and  
3 insufficient quarantining and isolation[2]. Jails—short-term carceral institutions—experienced  
4 these factors when the COVID-19 pandemic started in 2020[3]. That year, 7% of US jails were  
5 over-capacity, even though total admissions dropped from 10.3 million in 2019, to 8.7 million (  
6 16%) [4]. The Centers for Disease Control and Prevention (CDC) has published specific  
7 mitigation recommendations for carceral facilities [5-7]. Nonetheless, carceral COVID-19  
8 incidence exceeded that of surrounding communities up to five-fold [8]. To regularly screen  
9 thousands of individuals in a mega-jail for an often-asymptomatic disease poses logistic  
10 challenges, e.g., coordinating the timing of collecting tests with other activities [6, 9-13].  
11 Wastewater-based surveillance (WBS) can detect SARS-CoV-2 at an institutional level, and if  
12 implemented in jails, could potentially save time, resources, and lives [14].

13 Sampling wastewater via manholes downstream of a building, holds the potential of  
14 surveilling for SARS-CoV-2 in that building’s population. WBS may detect SARS-CoV-2 prior to  
15 clinical symptoms and serve as a sensitive, low-cost, non-invasive early warning tool [15-20].  
16 This study sought to validate WBS for monitoring SARS-CoV-2 infection in a large jail.

17 **Methods**

18 *Setting and Study Population*

19 The rated capacity of Fulton County (Georgia) Jail is 2,600 persons [21]. Mean  
20 population during our study period, October 2021 - May 2022, was 2,700 persons (SD=133). The  
21 main complex has north and south towers, each with seven floors, and six housing units per  
22 floor. People move to housing units within 24 hours after entry. Most new entrants go to one

23 floor of the south tower that is designated to house new admissions. Housing units usually hold  
24 40 persons maximum, in -up to 20 two-person cells. When resident volume exceeds capacity,  
25 extra mattresses in durable plastic frames (which residents call “boats”) are placed on the floor.  
26 The study population was persons in custody at the main complex of the jail, who on an  
27 average shift outnumber correctional officers over 15-fold. The jail provided demographic  
28 information on the predominately male study population at the main complex; after women  
29 are booked, most are moved to an annex located 14 miles south of the main complex. As of  
30 October 2022, 93% of the population was held on felony charges. The median length of stay has  
31 historically been 5 days [22], but this was longer during the pandemic.

### 32 *Wastewater Monitoring*

33 An Emory University sampling team collected weekly wastewater samples from the jail  
34 through the project period. Moore swabs (see Figure 1) were suspended overnight in manhole  
35 sites around the jail property (Figure 2) [23, 24]. Eluted wastewater from the swabs was tested  
36 using real time, quantitative reverse transcription-polymerase chain reaction (RT-qPCR) at the  
37 Center for Global Safe WASH Laboratory of Emory as previously described [25, 26]. The amount  
38 of SARS-CoV-2 viral RNA present in a sample was measured by the RT-qPCR cycle threshold (Ct)  
39 value, which was inversely related to the concentration of SARS-CoV-2 in the Moore swab  
40 eluate. Positive samples were defined as those with RT-qPCR results in both duplicate wells  $\leq 40$   
41 Ct and within 2 Ct of each other.

42 For this study, we assumed that the source of wastewater flowing under each manhole  
43 corresponded to only the zone of the building in closest proximity to the collection point. This  
44 assumption was tested by adding tracer dye (EcoClean Solutions, Copiague NY) into toilets in on

45 various housing blocks. When the dye from one housing block was detected in wastewater at  
46 multiple manholes, we assumed that the sewerage lines from multiple housing units were  
47 connected and that the wastewater at one manhole collection point could come from multiple  
48 housing blocks. For this analysis, we focused on wastewater data from a single, downstream  
49 collection point, Site 3 (See Figure 2), which contained a mix of wastewater from the south and  
50 north towers and used this as a proxy for the wastewater concentration of SARS-CoV-2 for the  
51 entire jail.

#### 52 *COVID-19 Individual Testing: Rapid Test Collection*

53 Healthcare staff offered universal opt-out rapid antigen testing to entrants and collected  
54 specimens at intake (BinaxNOW, Abbot Laboratories, Chicago, IL through 1/31/22; QuickVue,  
55 Quidel Corporation, San Diego CA starting 2/1/22). This diagnostic testing was part of the jail's  
56 daily, standard entry protocol. Later in jail custody, antigen testing was available if residents  
57 exhibited COVID-19 symptoms, or if an individual made a request.

58 *COVID-19 Individual Testing: PCR Nasal Swab Collection*

59 Concurrent with initiating WBS, a team from Emory University began a mass  
60 esp screening program in October 2021. We piloted self-collection of nasal specimens for  
61 ite PCR testing by the jail residents using a SteriPack swab [SteriPack, Lakeland FL],  
62 rapi following a previously reported qualitative study of the acceptability of the novel  
63 d specimen collection strategy [1]. On dates when mass collection of nasal swabs was  
64 spe performed, we hired off-duty correctional officers to escort the Emory specimen  
65 cim collection teams to areas of the jail to distribute and retrieve the nasal swabs. Bar  
66 en codes, pre-printed on the tubes, were scanned into a cloud-based registration portal  
67 coll system for the diagnostic testing laboratory (Northwell Health Laboratory, Lake  
68 ecti Success, NY) and minimized the time from specimen collection to registration to less  
69 on, than a minute per swab. We shipped swabs overnight to the laboratory for RT-PCR  
70 ins analysis via an LGC, Biosearch Technologies SARS-CoV-2 ultra-high-throughput End-  
71 uffi Point RT-PCR Test (BT-SCV2-UHTP-EP) to detect positive nasal swabs (Biosearch  
72 cie Technologies, Hoddesdon, UK).

73 nt  
74 staf  
75 fing precluded mass screening the entire resident population on any one occasion. Each week,  
76 areas of the jail screened by RT-PCR tests were either randomly selected or targeted, based on  
77 known ongoing outbreaks, to provide information for appropriate isolation and quarantine. We  
78 obtained nasal swabs for RT-PCR from a portion of the housed residents and used the results to  
79 develop a proxy measure for the prevalence of SARS-CoV-2 infection in the population. We

80 aggregated the PCR data with results of antigen testing to estimate COVID-19 population  
81 prevalence.

82

### 83 *Data Analysis*

84 All data were stored, managed and analyzed in Microsoft Excel and R (R Foundation for  
85 Statistical Computing, Vienna, Austria). Individual diagnostic test results for COVID-19 and the  
86 wastewater RT-PCR results were first analyzed separately to examine temporal trends. We then  
87 compared the trends in time-matched results from the COVID-19 individual tests and WBS. We  
88 calculated  $r$ , the Spearman's correlation coefficient, for the relationship between the Ct values  
89 of the wastewater samples and the proportion of the jail population with positive COVID-19  
90 tests. Lastly, we performed a logistic regression analysis of the presence or absence of SARS-  
91 CoV-2 in wastewater samples and the percentage of positive COVID-19 diagnostic tests  
92 matched by week. We assigned a Ct value of 40 when the RT-PCR result for a wastewater  
93 sample was negative.

### 94 *Human Subjects Statement*

95 The Emory University Institutional Review Board (IRB) determined that this project  
96 constituted non-human subject research, exempt from IRB oversight.

97

98

## **Results**

99 The study duration was 28 weeks, during which time all diagnostic tests and WBS samples  
100 were collected and analyzed. The total jail resident population during the study period ranged  
101 from 2,497 to 2,904. The majority of residents in the jail during the study period were male and

102 88.8% were Black. There were 17 mass diagnostic PCR testing events in the jail which resulted  
103 in a total of 3,770 self-collected swabs tested by RT-PCR. Rapid COVID-19 diagnostic test results  
104 were collected every week (28 weeks) and totaled 9,975 over the study period. Weather and  
105 holiday schedules permitted weekly wastewater sampling on 25 collection days.

106

107 *[Table 1 around here]*

108

109

110 *Detection of SARS-CoV-2 in Jail Wastewater*

111 In total, 79 samples were collected from 4 manholes sites (Figure 2). The Spearman's  
112 correlation coefficients show strong correlations between Ct values of wastewater samples  
113 collected from different sites on the same day (Table S2, Figure S2), which indicates that results  
114 from one site could be used as a proxy for wastewater from the entire jail. The flow of  
115 wastewater was examined through sewage mapping via dye testing (REF). This showed that  
116 wastewater from both towers accumulated in site 3 and the results from this site were used for  
117 further analyses.

118 SARS-CoV-2 was detected in 80% of 25 Moore swab samples of wastewater collected  
119 from site 3 during the study period. Of the 20 samples that tested positive between 20 October  
120 2021 and 4 May 2022, the mean Ct value was 33.94 (SD=3.74) and the median was 34.69.

121 Samples were not collected during three holiday weeks in November-December 2021.

122 There was considerable temporal variability in the wastewater Ct values during the  
123 study period (Figure 3). The wastewater Ct value declined sharply from the sample collected  
124 during the week of 15 December 2021 to the sample collected during the week of 5 January



125 2022. The minimum Ct value for the whole study period (28.1, likely corresponding to the peak  
126 SARS-CoV-2 concentration in the jail wastewater) was measured in a sample from 5 January  
127 2022 during the Omicron surge in Atlanta. The wastewater Ct values were in this range for five  
128 consecutive weeks (Figure 3). No SARS-CoV-2 RNA was detected in wastewater samples from  
129 one sampling date in November 2021 and four sampling dates in March-April 2022.

130

131 *[Figure 3 here]*

132

### 133 *COVID-19 Diagnostic Testing*

134 Table 2 summarizes COVID-19 diagnostic testing. The median number of total diagnostic  
135 tests conducted each week was 443 tests, and the majority of these were rapid antigen tests  
136 administered by the jail healthcare vendor. The median number of weekly rapid antigen tests  
137 was greater (363) than the number of PCR diagnostic tests that were administered during the  
138 mass testing events by the research study (mass testing event median = 186). The overall test  
139 positivity averaged 3.4% (SD= 6.6%) over the study period.

140 Figures 3 and 4 present the number of weekly COVID-19 diagnostic tests administered  
141 and the percentage of those that were positive over the study period. The total percentage of  
142 the jail population tested fluctuated but increased as the study progressed (Figure 3). Most was  
143 done via rapid antigen tests (Figure 4). Notable peaks in testing and test positivity occurred  
144 during the last weeks of December 2021 and early January 2022 during the Omicron surge in  
145 Atlanta.

146 the weekly test positivity rate correlated with the total percentage of the jail residents  
147 that were tested ( $\rho=0.308$ ,  $p\text{-value}=0.11$ ). (Figure 3).

148 Overall, the PCR tests consistently had a higher positivity rate than the routine rapid  
149 antigen testing. During the midwinter surge, there was a much higher proportion of positive  
150 PCR tests (e.g., week of December 28, 2021, 63.5%) compared to the proportion of positive  
151 rapid antigen tests (24.4%). Nonetheless, the positivity rates for the PCR test and rapid antigen  
152 test were correlated during weeks when both tests were administered ( $r= 0.65$ ,  $p\text{-value}=0.004$ ).

153

154 *[Table 2 here][Figure 4 here]*

155

156 *Relationship between COVID-19 Diagnostic Test Results and Wastewater Monitoring Results*

157 The relationship between the COVID-19 diagnostic test results and WBS results were  
158 examined in several ways. When the diagnostic test positivity rate was low for several weeks,  
159 e.g., March 9, 2022 – April 13, 2022, the Ct values for the wastewater samples were high (38.1-  
160 40) or negative, indicating little or no detection of SARS-CoV-2 RNA in the wastewater samples.  
161 Conversely, low Ct values were measured in the wastewater samples during the weeks when  
162 the COVID-19 test positivity rates were high, e.g., early January 2022. Overall, the total COVID-  
163 19 diagnostic test positivity rate had a strong negative correlation with the wastewater Ct  
164 values combined over time (Spearman's Correlation Coefficient:  $r= -0.67$ ,  $p\text{-value}= <0.01$ ) (Table  
165 3).

166 All diagnostic tests were grouped into one datapoint representing each week between  
167 October 20, 2021 – May 4, 2022. Spearman correlation coefficients were calculated within the

168 variable grouping of diagnostic test positivity rates and between variable groupings of  
169 diagnostic positivity rates and wastewater results (Table 3). Logistic regression was also used to  
170 analyze the relationship between the diagnostic positivity and the WBS results as a  
171 dichotomous outcome (presence/absence of SARS-CoV-2). Holding all other predictors  
172 constant, the odds of a positive WBS reading increased by 4.773 (95% CI 3.701-5.845) for a one  
173 unit increase in diagnostic test percent positivity (Figure S3).

174 *[Table 3 here]*

## 175 Discussion

176 prevalence of jail residents' COVID-19 positive tests correlated with SARS-CoV-2 detection  
177 in the jail wastewater over time, which provides evidence that WBS can serve as an indicator of  
178 the jail population infection and its residents' viral load. We also tested the feasibility and  
179 practicality of conducting both individual COVID-19 testing with self-collected nasal swabs and  
180 WBS on a routine basis. While gathered self-collected specimens rapidly, our inability to test all  
181 jail residents in a single shift supports the need for an aggregate measurement of population  
182 infection. Overall, our data indicate that WBS was a sensitive signal of when COVID-19 cases  
183 were present in the jail population and of surges in infection. [27, 28]

184 While the median number of rapid and PCR tests differed during the study period (363  
185 and 186, respectively), the strong correlation between the positivity rate of the two different  
186 tests ( $r= 0.65$ ,  $p\text{-value}= <0.01$ ) suggests relatively accurate results from both forms of diagnostic  
187 tests and a predisposition to test hotspot areas.

188 During the fall of 2021, there was an upward trend in the portion of the jail population  
189 that participated in the mass testing events (Figure 3). This occurred by establishing an efficient

190 screening method and having our testing routine improve over time so that each swab could be  
191 gathered and registered in under a minute. The jail's housing configuration (cells rather than  
192 open dormitories) slowed the collection process. Nonetheless, we demonstrated that our  
193 process could achieve specimen collection from multiple housing units per hour. Ideally, if we  
194 could sample wastewater from specific housing units, it may be possible to identify the housing  
195 area that was the source of SARS-CoV-2 detected in the wastewater and use this information to  
196 focus diagnostic testing on a smaller portion of the jail. The current mass testing methods  
197 would then be adequate to test the subpopulation with the positive wastewater sample.

198         There was one defined peak of diagnostic test positivity over the duration of the study  
199 on December 28, 2021 of 29.5% (Figure 3). The spike in COVID-19 cases in the jail (January 5,  
200 2022) occurred 8 days prior to a community surge in Fulton County and aligned with COVID-19  
201 case surges in Atlanta and nationwide due to the Omicron variant [29]. Therefore, jails may  
202 serve as an early warning signal for community spikes for COVID-19 and other infectious  
203 diseases detectable in wastewater.

204         This study demonstrated the efficiency and feasibility of conducting WBS for SARS-CoV-  
205 2 on a regular basis in a jail setting. Other jails have been conducting wastewater studies, but to  
206 our knowledge have yet to report a correlation with the proportion of the jail population  
207 testing positive for COVID-19 [30, 31]. WBS has been studied in non-carceral institutions, such  
208 as university residence halls, where the turnover rate of who resides in the dorm is low and  
209 students normally live an entire semester in the same room, but can have frequent visitors [16-  
210 18, 20, 32, 33]. In contrast, the median length of stay for a Fulton County Jail resident has  
211 historically been 5 days and the mean stay 22 days.[22] . This contrast between residence times

212 in university dormitories versus a jail may account for different utility of WBS data in this jail-  
213 based study compared to other settings.

214 Similar to the experience of WBS studies at university campuses, the collection and  
215 processing of Moore Swab samples from the jail are much less expensive and faster than  
216 individual diagnostic testing of the jail residents [32]. A report on costs of WBS in this study is  
217 pending, but they compare favorably with the previously reported WBS study of university  
218 residence halls, where ten Moore Swabs cost \$12, sample collection time averaged 30 minutes,  
219 sample processing time was 5 hours, and the overall turnaround time from sample collection to  
220 reporting final lab results was 2 to 3 days [18, 32].

#### 221 *Strengths*

222 The primary objective of this study was to examine if WBS is an effective and feasible  
223 strategy to monitor for COVID-19 outbreaks in a carceral setting. Strengths of this study are:

- 224 • Large jail population allowed for a reduction of diagnostic testing sampling bias.
- 225 • Weekly iterations of the mass diagnostic testing procedure allowed for several  
226 opportunities to enhance the number of diagnostic test results.
- 227 • High number of weekly diagnostic tests enabled us to compare the positivity rates with  
228 the WBS data.
- 229 • Weekly collection and analysis of WBS samples in tandem with the diagnostic tests.
- 230 • We eliminated the human error in data entry when we eliminated typing test  
231 identification barcodes into the portal and instead began scanning them straight into  
232 the portal.

- 233       • Close collaboration with jail officials provided the exclusive opportunity to conduct a  
234           prolonged study (6 months) within the jail, capturing the entirety of the Omicron variant  
235           peak.

236

### 237 *Limitations*

238 The current study had several limitations:

- 239       • Jail size, availability of escorts, and limited resources for testing team precluded  
240           diagnostic testing every week, or the entire jail population in any one week; results from  
241           the portion of the jail population that was tested for COVID-19 was used as a proxy for  
242           COVID-19 prevalence in the entire jail population.
- 243       • The data were derived from testing for public health practice, and individual testing was  
244           not conducted on a random basis but rather for individuals as needed for the purposes  
245           of an infection control program. Nonetheless, on no week was testing confined only to  
246           areas of the jail known to have high COVID-19 prevalence. For many weeks, rapid  
247           antigen tests were mainly administered to new residents at intake rather than the  
248           general jail population, and PCR testing was targeted to other areas in the jail.
- 249       • The RT-qPCR results (Ct values) for the Moore swab samples should be considered semi-  
250           quantitative. The concentration of SARS-CoV-2 RNA per volume of wastewater is not  
251           easily calculated since the wastewater flow through the Moore swab during the time it  
252           was submerged in the manhole is not known.
- 253       • The Ct values from the Moore swab samples provide only an approximate indication of  
254           the presence and number of COVID-19 cases in the jail due to uncertainty about the

255 magnitude and duration of SARS-CoV-2 fecal shedding and unknown dilution from the  
256 volume of wastewater [18]. Nonetheless, the strong correlation between the Ct Values  
257 and COVID-19 individual test positivity rate suggests that WBS is an effective method to  
258 surveil for SARS-CoV-2 in a jail setting.

- 259 • A jail is not a closed system: many people are entering and leaving on a daily basis. A  
260 resident who sheds fecal matter containing SARS-CoV-2 on one day may leave the jail  
261 before the next round of individual screening for COVID-19.
- 262 • Only COVID-19 tests of residents were included in our analyses, but staff contribute to  
263 wastewater. Since residents greatly outnumbered staff, fecal material from staff  
264 probably had a negligible effect on the WBS results. Jail staff were periodically offered  
265 diagnostic testing at roll call, and their test positivity patterns mirrored the trends for  
266 the residents (data not shown).
- 267 • Weekly COVID-19 test results were aggregated from Sunday to Saturday, whereas  
268 wastewater sample collection occurred mid-week. We might have observed a stronger  
269 correlation between the wastewater and diagnostic test results if the wastewater  
270 samples were collected more frequently.

271  
272  
273

274 **Conclusion**

275  
276 Even under ideal circumstances-- external funding, collegial working relationships, and  
277 adequate resources--administering individual COVID-19 diagnostic tests to the entire Fulton  
278 County Jail on a weekly basis was not a feasible COVID-19 surveillance strategy. However,  
279 conducting WBS at the jail was highly effective and sustainable. The WBS results aligned well  
280 with the COVID-19 diagnostic test positivity rates among jail residents and could serve as a  
281 sensitive and economical surveillance tool for COVID-19 in a large jail facility. Overall, the high  
282 resident turnover rate in the jail, the countywide geographic range of the subjects entering the  
283 jail, and the high proportion of wastewater samples with SARS-CoV-2 detection suggest that  
284 WBS at the jail is important not only for understanding COVID-19 burden in the jail and using  
285 the results to guide public health response to mitigate transmission but also that jails could  
286 serve as a valuable sentinel site for monitoring trends in COVID-19 prevalence and genetic  
287 variants in the wider community.

288

289

290 Acknowledgments: We wish to thank the Fulton County Sheriff Patrick Labat and the Sheriff's  
291 Office, Fulton County Jail staff, and the FCJ team members of NaphCare and Johnson Controls,  
292 whose help has been invaluable. We are grateful for the residents of FCJ who participated in  
293 this public health project. We thank Jamie VanTassell and Lauren Briggman for wastewater  
294 sample collection; Orlando Sablon, Lizheng Guo, Matthew Cavallo, Caleb Cantrell, Jillian Dunbar  
295 for laboratory analyses; and Haisu Zhang, Lutfe-E-Noor Rahman, and Weiding Fang for  
296 wastewater data management and analyses.

297



## References

- 298  
299
- 300 1. del Mar González-Montalvo M, Dickson PF, Saber LB, et al. Opinions of Former Jail  
301 Residents about Self-collection of SARS-CoV-2 Specimens,  
302 Paired with Wastewater Surveillance: A Qualitative Study Rapidly Examining  
303 Acceptability of COVID-19 Mitigation Measures. Emory University, **2022**.
  - 304 2. Ayouni I, Maatoug J, Dhouib W, et al. Effective public health measures to mitigate the  
305 spread of COVID-19: a systematic review. BMC Public Health **2021**; 21(1): 1015.
  - 306 3. Akiyama MJ, Spaulding AC, Rich JD. Flattening the Curve for Incarcerated Populations —  
307 Covid-19 in Jails and Prisons. New England Journal of Medicine **2020**; 382(22): 2075-7.
  - 308 4. Zeng Z, Milton, T.D. Jail inmates in 2020. Bureau of Justice Statistic Bulletin. December  
309 2021, NCJ 30330. Available: <https://bjs.ojp.gov/content/pub/pdf/ji20st.pdf> Accessed 2  
310 August 2022.
  - 311 5. Kirbiyik U, Binder AM, Ghinai I, et al. Network Characteristics and Visualization of  
312 COVID-19 Outbreak in a Large Detention Facility in the United States - Cook County,  
313 Illinois, 2020. MMWR Morb Mortal Wkly Rep **2020**; 69(44): 1625-30.
  - 314 6. Hagan LM, McCormick DW, Lee C, et al. Outbreak of SARS-CoV-2 B.1.617.2 (Delta)  
315 Variant Infections Among Incarcerated Persons in a Federal Prison - Texas, July-August  
316 2021. MMWR Morb Mortal Wkly Rep **2021**; 70(38): 1349-54.
  - 317 7. Interim Guidance on Management of Coronavirus Disease 2019 (COVID-19) in  
318 Correctional and Detention Facilities, February 19, 2021 Update. URL:  
319 [https://www.cdc.gov/coronavirus/2019-ncov/community/correction-](https://www.cdc.gov/coronavirus/2019-ncov/community/correction-detention/guidance-correctional-detention.html)  
320 [detention/guidance-correctional-detention.html](https://www.cdc.gov/coronavirus/2019-ncov/community/correction-detention/guidance-correctional-detention.html) Accessed 17 April 2021.
  - 321 8. Marusinec R, Brodie D, Buhain S, et al. Epidemiology of Coronavirus Disease 2019 at a  
322 County Jail-Alameda County, California, March 2020-March 2021. J Public Health Manag  
323 Pract **2022**; 28(1): 50-9.
  - 324 9. Zawitz C, Welbel S, Ghinai I, et al. Outbreak of COVID-19 and interventions in a large jail  
325 - Cook County, IL, United States, 2020. Am J Infect Control **2021**; 49(9): 1129-35.
  - 326 10. Hagan LM, Williams SP, Spaulding AC, et al. Mass Testing for SARS-CoV-2 in 16 Prisons  
327 and Jails - Six Jurisdictions, United States, April-May 2020. MMWR Morb Mortal Wkly  
328 Rep **2020**; 69(33): 1139-43.
  - 329 11. Tompkins LK, Gunn JKL, Cherney B, et al. Mass SARS-CoV-2 Testing in a Dormitory-Style  
330 Correctional Facility in Arkansas. Am J Public Health **2021**; 111(5): 907-16.
  - 331 12. Tsoungui Obama HCJ, Adil Mahmoud Yousif N, Alawam Nemer L, et al. Preventing  
332 COVID-19 spread in closed facilities by regular testing of employees-An efficient  
333 intervention in long-term care facilities and prisons? PLoS One **2021**; 16(4): e0249588.
  - 334 13. Njuguna H, Wallace M, Simonson S, et al. Serial Laboratory Testing for SARS-CoV-2  
335 Infection Among Incarcerated and Detained Persons in a Correctional and Detention  
336 Facility - Louisiana, April-May 2020. MMWR Morb Mortal Wkly Rep **2020**; 69(26): 836-  
337 40.
  - 338 14. Harris-Lovett S, Nelson KL, Beamer P, et al. Wastewater Surveillance for SARS-CoV-2 on  
339 College Campuses: Initial Efforts, Lessons Learned, and Research Needs. Int J Environ  
340 Res Public Health **2021**; 18(9).

- 341 15. Gonzalez R, Curtis K, Bivins A, et al. COVID-19 surveillance in Southeastern Virginia using  
342 wastewater-based epidemiology. *Water Res* **2020**; 186: 116296.
- 343 16. Betancourt WQ, Schmitz BW, Innes GK, et al. COVID-19 containment on a college  
344 campus via wastewater-based epidemiology, targeted clinical testing and an  
345 intervention. *Sci Total Environ* **2021**; 779: 146408.
- 346 17. Gibas C, Lambirth K, Mittal N, et al. Implementing building-level SARS-CoV-2 wastewater  
347 surveillance on a university campus. *Sci Total Environ* **2021**; 782: 146749.
- 348 18. Wang Y, Liu P, Zhang H, et al. Early warning of a COVID-19 surge on a university campus  
349 based on wastewater surveillance for SARS-CoV-2 at residence halls. *Sci Total Environ*  
350 **2022**: 153291.
- 351 19. Wu F, Xiao A, Zhang J, et al. SARS-CoV-2 RNA concentrations in wastewater foreshadow  
352 dynamics and clinical presentation of new COVID-19 cases. *Sci Total Environ* **2022**; 805:  
353 150121.
- 354 20. Karthikeyan S, Nguyen A, McDonald D, et al. Rapid, Large-Scale Wastewater Surveillance  
355 and Automated Reporting System Enable Early Detection of Nearly 85% of COVID-19  
356 Cases on a University Campus. *mSystems* **2021**; 6(4): e0079321.
- 357 21. Office C. Fulton County Jail. Available at: [https://www.countyoffice.org/fulton-county-  
358 jail-atlanta-ga-e4f/](https://www.countyoffice.org/fulton-county-jail-atlanta-ga-e4f/).
- 359 22. Spaulding AC, Kim MJ, Corpening KT, Carpenter T, Watlington P, Bowden CJ. Establishing  
360 an HIV Screening Program Led by Staff Nurses in a County Jail. *J Public Health Manag  
361 Pract* **2015**; 21(6): 538-45.
- 362 23. VanTassell J, Raymond J, Wolfe MK, Liu P, Moe C. Wastewater Sample Collection -  
363 Moore Swab and Grab Sample Methods. Available at:  
364 [https://www.protocols.io/view/wastewater-sample-collection-moore-swab-and-grab-s-  
365 81wgb6djnlpk/v1](https://www.protocols.io/view/wastewater-sample-collection-moore-swab-and-grab-s-81wgb6djnlpk/v1).
- 366 24. Sikorski MJ, Levine MM. Reviving the "Moore Swab": a Classic Environmental  
367 Surveillance Tool Involving Filtration of Flowing Surface Water and Sewage Water To  
368 Recover Typhoidal Salmonella Bacteria. *Appl Environ Microbiol* **2020**; 86(13).
- 369 25. Sablon O, VanTassell J, Raymond J, Wolfe MK, Liu P, Moe C. Nanotrap® KingFisher™  
370 Concentration/Extraction & MagMAX KingFisher™ Extraction. Available at:  
371 [https://www.protocols.io/view/nanotrap-kingfisher-concentration-extraction-amp-m-  
372 bp2l61ke5vqe/v1](https://www.protocols.io/view/nanotrap-kingfisher-concentration-extraction-amp-m-bp2l61ke5vqe/v1).
- 373 26. Svezia C, Nguyen A, VanTassell J, et al. Singleplex qPCR for SARS-CoV-2 N1 and BRSV.  
374 Available at: [https://www.protocols.io/view/singleplex-qpcr-for-sars-cov-2-n1-and-brsv-  
375 bp2l61kqkvqe/v1](https://www.protocols.io/view/singleplex-qpcr-for-sars-cov-2-n1-and-brsv-bp2l61kqkvqe/v1).
- 376 27. Hagan LM, Williams SP, Spaulding AC, et al. Mass Testing for SARS-CoV-2 in 16 Prisons  
377 and Jails — Six Jurisdictions, United States, April–May 2020. *MMWR Morb Mortal Wkly  
378 Rep* 2020;69:1139–1143. DOI: <http://dx.doi.org/10.15585/mmwr.mm6933a3>.
- 379 28. Tompkins LK, Gunn JKL, Cherney B, et al. Mass SARS-CoV-2 Testing in a Dormitory-Style  
380 Correctional Facility in Arkansas. *American Journal of Public Health* **2021**; 111(5): 907-  
381 16.
- 382 29. Prevention CfDca. COVID Data Tracker. Available at: [https://covid.cdc.gov/covid-data-  
383 tracker](https://covid.cdc.gov/covid-data-tracker).

- 384 30. Institute DP. Chicago Department of Public Health and the Discovery Partners Institute  
385 Announce Citywide System to Monitor COVID-19 in Wastewater. **2021**.
- 386 31. Office MSs. Middlesex Sheriff's Office using wastewater analysis to monitor for COVID.  
387 Middlesex Jail & House of Correction the first county jail to partner with Cambridge-  
388 based Biobot Analytics, **2021**.
- 389 32. Liu P, Ibaraki M, VanTassell J, et al. A sensitive, simple, and low-cost method for COVID-  
390 19 wastewater surveillance at an institutional level. *Sci Total Environ* **2022**; 807(Pt 3):  
391 151047.
- 392 33. Moody J. How Long Is a College Semester? Available at:  
393 [https://www.usnews.com/education/best-colleges/articles/how-long-is-a-college-](https://www.usnews.com/education/best-colleges/articles/how-long-is-a-college-semester)  
394 [semester](https://www.usnews.com/education/best-colleges/articles/how-long-is-a-college-semester).
- 395 34. Spaulding AC, Perez SD, Seals RM, Hallman MA, Kavasery R, Weiss PS. Diversity of  
396 release patterns for jail detainees: implications for public health interventions. *American*  
397 *journal of public health* **2011**; 101(S1): S347-S52.  
398

Figure 1. Moore Swab. 4" by 4" cotton gauze squares, tied together with nylon fishing line

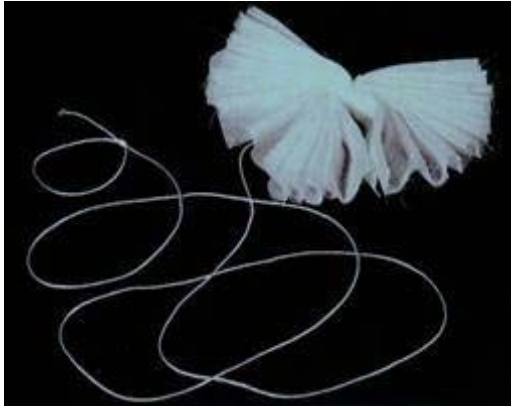

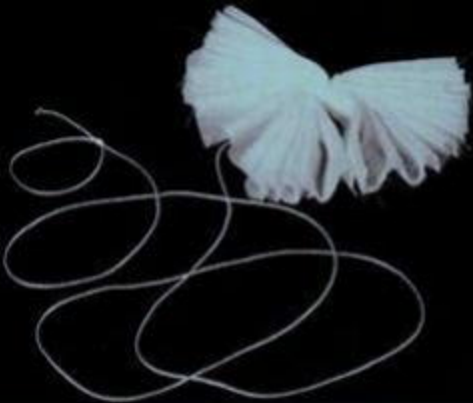

Figure 2. Manhole locations used for wastewater sample collection on the Fulton County Jail property (Google Maps)

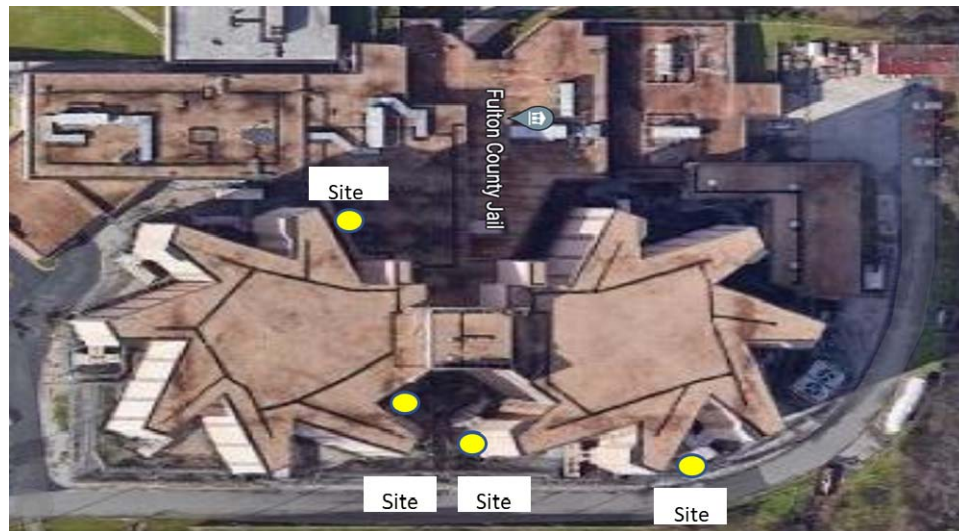

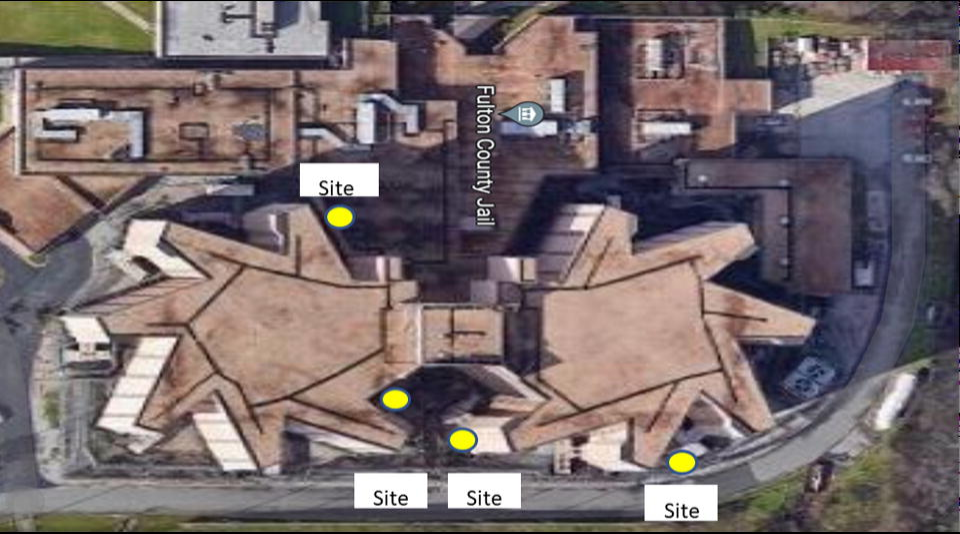

Fulton County Jail

Site

Site

Site

Site

Figure 3. SARS-CoV-2 Ct Values for Wastewater and COVID-19 Diagnostic Results for Jail Residents by week, October 20, 2021 – May 4, 2022, Fulton County (GA) Jail.

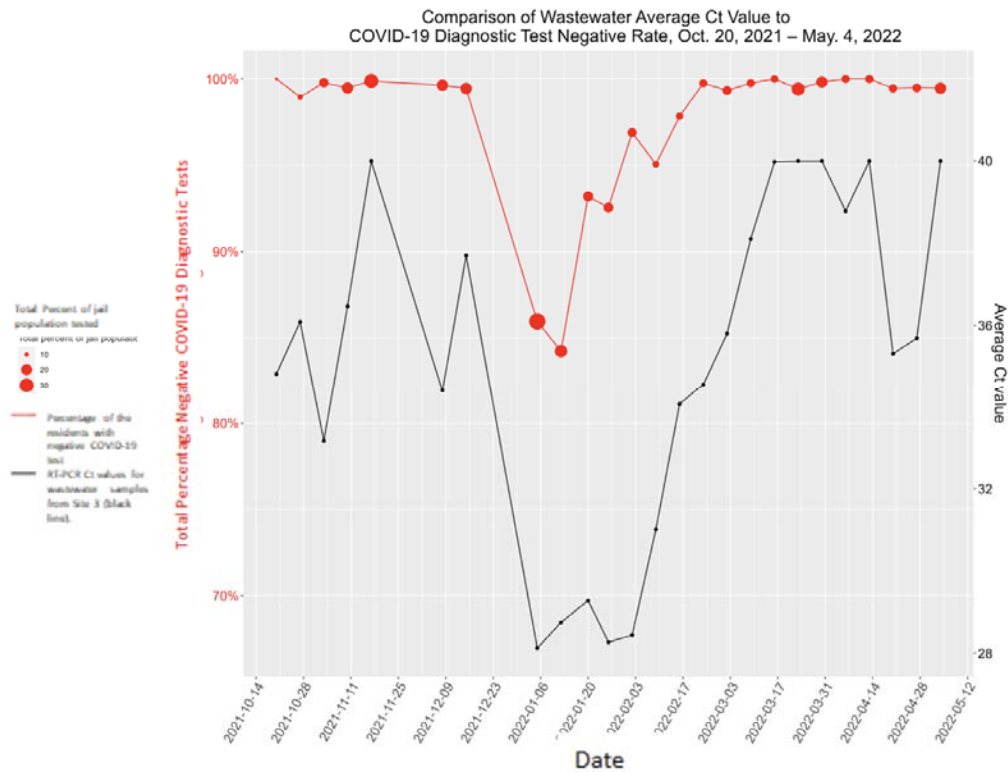



Comparison of Wastewater Average Ct Value to COVID-19 Diagnostic Test Negative Rate, Oct. 20, 2021 – May. 4, 2022

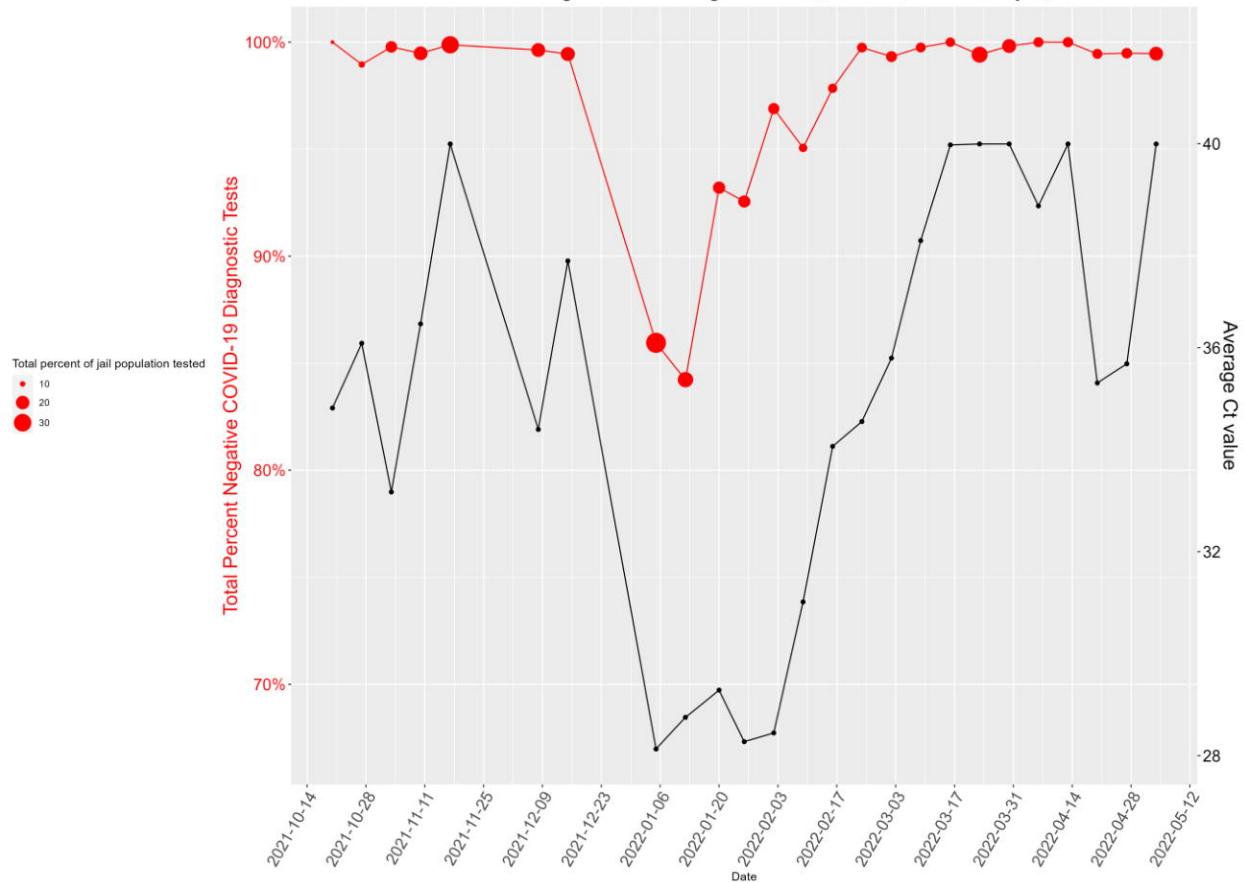

Figure 4. Total number and type of COVID-19 diagnostic tests of jail residents and percentage of positive tests by week, October 20, 2021 – May 4, 2022. Fulton County (GA) Jail.

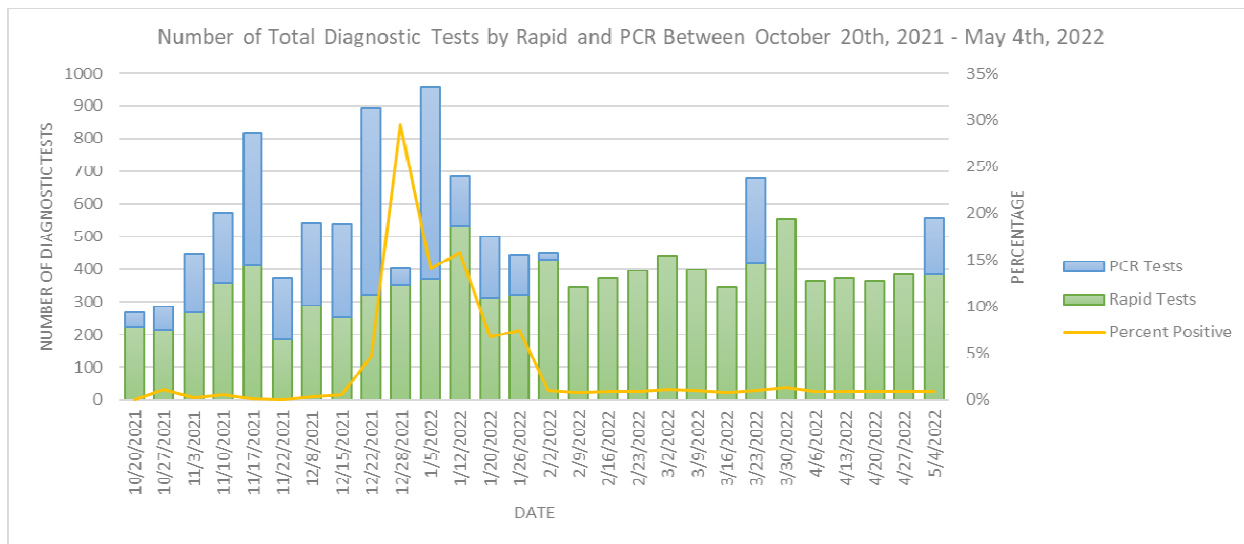

Number of Total Diagnostic Tests by Rapid and PCR Between October 20th, 2021 - May 4th, 2022

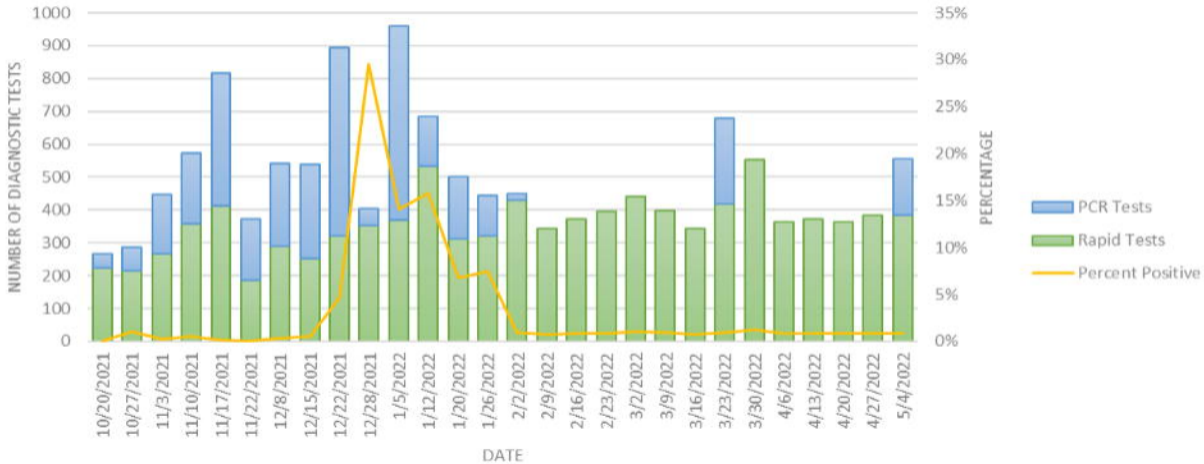

Source: https://www.medrxiv.org/content/10.1101/2023.05.17.23290000v1.full.pdf
